# Supplementary material
Source: ML conference proceedings conference paper supplement (https://openreview.net/forum?id=FvvPVzPZhi)
Supplement: supplementary_material [file attachment]

## APPENDIX

### A PROPERTIES OF SEPARATORS

**PROPOSITION 1** Let  $S_1, S_2 \in \mathcal{S}_{s,t}(G)$ . Then  $C_s(G-S_1) \subseteq C_s(G-S_2)$  if and only if  $C_t(G-S_2) \subseteq C_t(G-S_1)$ .

*Proof.* If  $C_s(G-S_1) \subseteq C_s(G-S_2)$ , then  $C_s(G-S_1) \cup N_G(C_s(G-S_1)) \subseteq C_s(G-S_2) \cup N_G(C_s(G-S_2))$ . By Lemma 1 we have that  $S_1 = N_G(C_s(G-S_1))$ . Therefore,  $C_s(G-S_1) \cup S_1 \subseteq C_s(G-S_2) \cup N_G(C_s(G-S_2))$ . In particular,  $S_1 \cap C_t(G-S_2) = \emptyset$ . This means that  $C_t(G-S_2)$  is contained in the connected component of  $G-S_1$  that contains  $t$ . By definition,  $C_t(G-S_2) \subseteq C_t(G-S_1)$ . The other direction is symmetrical.  $\square$

**PROPOSITION 2** Let  $S_1, S_2$  be two  $s, t$ -separators in  $H$ . Then  $S_1 \preceq_H S_2$  if and only if  $C_s(H-S_1) \subseteq C_s(H-S_2)$  and  $C_t(H-S_2) \subseteq C_t(H-S_1)$ .

*Proof.* If  $C_s(H-S_1) \subseteq C_s(H-S_2)$ , then  $\emptyset = C_s(H-S_2) \cap S_2 \supseteq C_s(H-S_1) \cap S_2$ , and hence  $C_s(H-S_1) \cap S_2 = \emptyset$ . Consequently,  $(S_2 \setminus S_1) \cap (C_s(H-S_1) \cup S_1) = \emptyset$ . Every vertex connected to  $s$  in  $H-S_1$  belongs to  $C_s(H-S_1)$ . Since  $(S_2 \setminus S_1) \cap (C_s(H-S_1) \cup S_1) = \emptyset$ , then  $S_1$  separates  $s$  from  $S_2 \setminus S_1$ . Symmetrically, if  $C_t(H-S_2) \subseteq C_t(H-S_1)$ , then  $(S_1 \setminus S_2) \cap (C_t(H-S_2) \cup S_2) = \emptyset$ , thus  $S_2$  separates  $t$  from  $S_1 \setminus S_2$ .

If  $S_1$  separates  $s$  from  $S_2 \setminus S_1$ , then  $(S_2 \setminus S_1) \cap C_s(H-S_1) = \emptyset$ . By definition,  $S_1 \cap C_s(H-S_1) = \emptyset$ , and hence  $S_2 \cap C_s(H-S_1) = \emptyset$ . This, in turn, means that  $C_s(H-S_1)$  is contained in the connected component of  $H-S_2$  that contains  $s$ . By definition,  $C_s(H-S_1) \subseteq C_s(H-S_2)$ . Symmetrically, if  $S_2$  separates  $t$  from  $S_1 \setminus S_2$ , then  $C_t(H-S_2) \subseteq C_t(H-S_1)$ . So, if  $S_1 \preceq_H S_2$  then  $C_s(H-S_1) \subseteq C_s(H-S_2)$  and  $C_t(H-S_2) \subseteq C_t(H-S_1)$ .  $\square$

**Proposition 3.** Let  $S \in \mathcal{S}_{s,t}(G)$  where  $S \subseteq N_G(s)$ . For every  $T \in \mathcal{S}_{s,t}(G)$ , it holds that  $C_s(G-S) \subseteq C_s(G-T)$ .

*Proof.* Since  $S \subseteq N_G(s) \subseteq T \cup C_s(G-T)$ , then  $C_s(G-S) \subseteq C_s(G-T)$ .  $\square$

#### A.1 SEPARATORS BETWEEN VERTEX-SETS

**Lemma 3.** Let  $A$  and  $B$  be two disjoint, non-adjacent subsets of  $V(G)$ . Then  $S \in \mathcal{S}_{A,B}(G)$  if and only if  $S$  is an  $A, B$ -separator, and for every  $w \in S$ , there exist two connected components  $C_A, C_B \in \mathcal{C}(G-S)$  such that  $C_A \cap A \neq \emptyset$ ,  $C_B \cap B \neq \emptyset$ , and  $w \in N_G(C_A) \cap N_G(C_B)$ .

*Proof.* If  $S \in \mathcal{S}_{A,B}(G)$ , then for every  $w \in S$  it holds that  $S \setminus \{w\}$  no longer separates  $A$  from  $B$ . Hence, there is a path from some  $a \in A$  to some  $b \in B$  in  $G-(S \setminus \{w\})$ . Let  $C_a$  and  $C_b$  denote the connected components of  $\mathcal{C}(G-S)$  containing  $a \in A$  and  $b \in B$ , respectively. Since  $C_a$  and  $C_b$  are connected in  $G-(S \setminus \{w\})$ , then  $w \in N_G(C_a) \cap N_G(C_b)$ .

Suppose that for every  $w \in S$ , there exist two connected components  $C_A, C_B \in \mathcal{C}_G(S)$  such that  $C_A \cap A \neq \emptyset$ ,  $C_B \cap B \neq \emptyset$ , and  $w \in N_G(C_A) \cap N_G(C_B)$ . If  $S \notin \mathcal{S}_{A,B}(G)$ , then  $S \setminus \{w\}$  separates  $A$  from  $B$  for some  $w \in S$ . Since  $w$  connects  $C_A$  to  $C_B$  in  $G-(S \setminus \{w\})$ , no such  $w \in S$  exists, and thus  $S \in \mathcal{S}_{A,B}(G)$ .  $\square$

Observe that Lemma 3 implies Lemma 1. By Lemma 3 it holds that  $S \in \mathcal{S}_{s,t}(G)$  if and only if  $S$  is an  $s, t$ -separator and  $S \subseteq N_G(C_s(G-S)) \cap N_G(C_t(G-S))$ . By definition,  $N_G(C_s(G-S)) \subseteq S$  and  $N_G(C_t(G-S)) \subseteq S$ , and hence  $S = N_G(C_s(G-S)) \cap N_G(C_t(G-S))$ , and  $S = N_G(C_s(G-S)) = N_G(C_t(G-S))$ .

**Lemma 4.** Let  $G$  and  $H$  be graphs where  $V(G) = V(H)$  and  $E(G) \subseteq E(H)$ . Let  $A, B \subseteq V(G)$  disjoint and non-adjacent. Let  $S \in \mathcal{S}_{A,B}(G)$ . If  $S$  is an  $A, B$ -separator in  $H$ , then  $S \in \mathcal{S}_{A,B}(H)$ .

*Proof.* Since  $S \in \mathcal{S}_{A,B}(G)$ , then by Lemma 3 for every  $u \in S$  there exist two distinct connected components  $C_A^u, C_B^u \in \mathcal{C}(G-S)$  where  $C_A^u \cap A \neq \emptyset$ ,  $C_B^u \cap B \neq \emptyset$ , and  $u \in N_G(C_A^u) \cap N_G(C_B^u)$ . Since  $E(H) \supseteq E(G)$ , and since  $S$  is an  $A, B$ -separator in  $H$ , then  $H-S$  contains two distinct connected components  $D_A^u, D_B^u$  where  $C_A^u \subseteq D_A^u$  and  $C_B^u \subseteq D_B^u$ . Therefore,  $u \in N_H(D_A^u) \cap N_H(D_B^u)$ . By Lemma 3 we have that  $S \in \mathcal{S}_{A,B}(H)$ .  $\square$

**Lemma 5.** Let  $u \in V(G) \setminus sB$  such that  $N_G(u) \subseteq N_G(s)$ . Then  $\mathcal{S}_{s,B}(G) = \mathcal{S}_{s,B}(G-u)$

*Proof.* Let  $S \in \mathcal{S}_{s,B}(G)$ . We first show that  $u \notin S$ . Suppose, by way of contradiction, that  $u \in S$ . By Lemma 3, there exist two distinct vertices  $x, y \in N_G(u)$  such that  $x \in C_s(G-S)$  and  $y \in C_B(G-S)$ , where  $C_B(G-S) \cap B \neq \emptyset$ . By the assumption of the lemma that  $N_G(u) \subseteq N_G(s)$ , then  $y \in N_G(s)$ . But then,  $S$  is not an  $s, B$ -separator of  $G$ ; a contradiction. Hence  $u \notin S$  for any  $S \in \mathcal{S}_{s,B}(G)$ .

Let  $T \in \mathcal{S}_{s,B}(G-u)$ . We show that  $T$  is an  $s, B$ -separator of  $G$ . If it is not, then since every  $s, B$ -path of  $G-u$  is also an  $s, B$ -path of  $G$ , then  $T \cup \{u\} \in \mathcal{S}_{s,B}(G)$ . But this contradicts the fact that  $u \notin S$  for every  $S \in \mathcal{S}_{s,B}(G)$ . Hence,  $T$  is an  $s, B$ -separator of  $G$ . By Lemma 4, we have that  $T \in \mathcal{S}_{s,B}(G)$ . Hence, we have that  $\mathcal{S}_{s,B}(G-u) \subseteq \mathcal{S}_{s,B}(G)$ . For the other direction, let  $T \in \mathcal{S}_{s,B}(G)$ . Clearly  $T$  is an  $s, B$ -separator of  $G-u$ . If  $T \notin \mathcal{S}_{s,B}(G-u)$ , then there exist a  $T' \subset T$  s.t.  $T' \in \mathcal{S}_{s,B}(G-u)$ . By the previous direction, we have that  $T' \in \mathcal{S}_{s,B}(G-u) \subseteq \mathcal{S}_{s,B}(G)$ . But then,  $T' \in \mathcal{S}_{s,B}(G)$  contradicting the minimality of  $T$ . Hence,  $\mathcal{S}_{s,B}(G-u) = \mathcal{S}_{s,B}(G)$ .  $\square$

**Lemma 6.** Let  $A \subseteq V(G) \setminus Bs$ . Let  $H$  be the graph that results from  $G$  by (1) adding all edges between  $s$  and  $N_G(A)$ , and (2) removing the vertices  $A$  and their adjacent edges from  $H$ . Then  $\mathcal{S}_{sA,B}(G) = \mathcal{S}_{s,B}(H)$ .

*Proof.* Let  $T \in \mathcal{S}_{sA,B}(G)$ , and let  $C_1, \dots, C_k$  denote the connected components of  $\mathcal{C}(G-T)$  containing vertices from  $sA$ . By definition,  $B \cap C_i = \emptyset$  for all  $i \in \{1, 2, \dots, k\}$ . Assume wlog that  $s \in C_1$ . Let  $H'$  denote the graph that results from  $G$  by adding all edges between  $s$  and  $N_G(A)$ . By definition, the edges added to  $G$  to form  $H'$  are between  $C_1$  and  $C_1 \cdots C_k \cup T$ . Therefore,  $T$  separates  $sA$  from  $B$  in  $H'$ . Since  $\mathbb{E}(H') \supseteq \mathbb{E}(G)$ , then by Lemma 4, if  $T \in \mathcal{S}_{sA,B}(G)$  and  $T$  is an  $sA, B$ -separator in  $H'$ , then  $T \in \mathcal{S}_{sA,B}(H')$ . Therefore, we have that  $\mathcal{S}_{sA,B}(G) \subseteq \mathcal{S}_{sA,B}(H')$ .

We now claim that  $\mathcal{S}_{sA,B}(H') = \mathcal{S}_{s,B}(H')$ . Take  $T \in \mathcal{S}_{s,B}(H')$ . We claim that  $T$  is an  $sA, B$ -separator in  $H'$ . Suppose it is not, and let  $C \in \mathcal{C}(H'-T)$  such that  $a, b \in C$  where  $a \in A$  and  $b \in B$ . Let  $y \in N_{H'}(a) \cap C$ . By construction,  $y \in N_{H'}(s)$ . But then,  $s \in N_{H'}(C)$  and hence  $T$  is not an  $s, B$ -separator in  $H'$ ; a contradiction. Since  $T \in \mathcal{S}_{s,B}(H')$ , then by Lemma 3, we have that for every  $u \in T$  there exists a connected component  $C_B^u \in \mathcal{C}(H'-T)$  s.t.  $B \cap C_B^u \neq \emptyset$  and  $u \in N_{H'}(C_s(H'-T)) \cap N_{H'}(C_B^u)$ . By Lemma 3, we have that  $T \in \mathcal{S}_{sA,B}(H')$ . Hence  $\mathcal{S}_{s,B}(H') \subseteq \mathcal{S}_{sA,B}(H')$ . For the other direction, let  $T \in \mathcal{S}_{sA,B}(H')$ . Clearly,  $T$  is an  $s, B$ -separator of  $H'$ . If  $T \notin \mathcal{S}_{s,B}(H')$ , then there exists a  $T' \subset T$  such that  $T' \in \mathcal{S}_{s,B}(H')$ . By the previous direction, we have that  $T' \in \mathcal{S}_{sA,B}(H')$ , but this contradicts the minimality of  $T$ . Hence,  $\mathcal{S}_{s,B}(H') = \mathcal{S}_{sA,B}(H')$ . Overall, we have shown that  $\mathcal{S}_{sA,B}(G) \subseteq \mathcal{S}_{sA,B}(H') = \mathcal{S}_{s,B}(H')$ .

Let  $T \in \mathcal{S}_{s,B}(H')$ . We first show that  $T$  separates  $sA$  from  $B$  in  $G$ ; if not, there is a path from  $x \in sA$  to  $B$  in  $G-T$ . Let  $u$  be the first vertex on this path such that  $u \notin sA$ . Note that such a vertex  $u \notin sA$  must exist because  $B \cap sA = \emptyset$ . In particular,  $u \in N_G(sA)$ , and by construction,  $u \in N_{H'}(s)$ . This means that there is a path from  $s$  to  $B$  (via  $u$ ) in  $H'-T$ , which is a contradiction. Therefore,  $T$  is an  $sA, B$ -separator in  $G$ . If  $T \notin \mathcal{S}_{sA,B}(G)$ , then there is a  $T' \in \mathcal{S}_{sA,B}(G)$  where  $T' \subset T$ . By the previous direction,  $T' \in \mathcal{S}_{sA,B}(G) \subseteq \mathcal{S}_{s,B}(H')$ , and hence  $T' \in \mathcal{S}_{s,B}(H')$ , contradicting the minimality of  $T \in \mathcal{S}_{s,B}(H')$ . Therefore,  $\mathcal{S}_{sA,t}(G) = \mathcal{S}_{s,B}(H')$ .

By construction, for every  $u \in sA$ , we have that  $N_{H'}(u) \subseteq N_{H'}(s)$ . From Lemma 5, we have that  $\mathcal{S}_{s,B}(H') = \mathcal{S}_{s,B}(H)$ . Therefore,  $\mathcal{S}_{sA,t}(G) = \mathcal{S}_{s,B}(H)$ .  $\square$

**THEOREM 3.** Let  $A, B \subseteq V(G)$  be disjoint and non-adjacent, where  $s \in A$  and  $t \in B$ . Let  $H$  be the graph that results from  $G$  by: (1) adding all edges between  $s$  and  $N_G(A)$ , (2) adding all edges between  $t$  and  $N_G(B)$ , and (3) removing vertices  $AB \setminus \{s, t\}$  and their adjacent edges. Then  $\mathcal{S}_{s,t}(H) = \mathcal{S}_{A,B}(G)$ .

*Proof.* Let  $H_1$  be the graph that results from  $G$  by adding all edges between  $s$  and  $N_G(A)$ , and removing vertices  $A \setminus \{s\}$  from the graph. By Lemma 6, we have that  $\mathcal{S}_{A,B}(G) = \mathcal{S}_{s,B}(H_1)$ . By the assumption that  $A$  and  $B$  are disjoint and non-adjacent, then  $N_G[B] = N_{H_1}[B]$ . Now, let  $H_2$  be the graph that results from  $H_1$  by adding all edges between  $t$  and  $N_{H_1}(B) = N_G(B)$ , and removing vertices  $B \setminus \{t\}$  from the graph  $H_2$ . By Lemma 6, we have that  $\mathcal{S}_{s,t}(H_2) = \mathcal{S}_{s,B}(H_1) = \mathcal{S}_{A,B}(G)$ .  $\square$

## A.2 MINIMUM SEPARATORS

**THEOREM 4.** There exists a unique minimum  $s, t$ -separator  $S^* \in \mathcal{L}_{s,t}(G)$  such that  $S^* \preceq S$  for all  $S \in \mathcal{L}_{s,t}(G)$ , and  $S^*$  can be found in time  $O(n \cdot \ell \cdot T(n, m))$ , where  $\ell$  is the maximum-cardinality of any minimum-weight  $s, t$ -separator;  $\ell \stackrel{\text{def}}{=} \max \{|S| : S \in \mathcal{L}_{s,t}(G)\}$ .

Theorem 4 is a straightforward extension of the following Theorem.

**Theorem 14.** (Cygan et al. [2015]) Let  $G$  be a non-weighted graph (i.e.,  $w(v) = 1$  for every  $v \in V(G)$ ). There exists a unique minimum-cardinality  $s, t$ -separator  $S^* \in \mathcal{L}_{s,t}(G)$  such that  $S^* \preceq S$  for all  $S \in \mathcal{L}_{s,t}(G)$ , and  $S^*$  can be found in time  $O(n \cdot T(n, m))$ .

For completeness, we provide the proof of Theorem 4 herein.

**Theorem 15.** (Theorem 8.3 in Cygan et al. [2015]) For  $X, Y \subseteq V(G)$ . It holds that:

$$|N_G(X)| + |N_G(Y)| \geq |N_G(X \cap Y)| + |N_G(X \cup Y)|.$$

*Proof Overview.* The proof establishes that for every vertex  $v \in V(G)$ , the number of times it is accounted for in the left-hand-side (LHS) is at least as large as the number of times it is accounted for in the right-hand-side (RHS), thereby proving the claim.  $\square$

**Lemma 7.** Let  $G$  be an undirected, weighted graph, with weight function  $w : V(G) \rightarrow \mathbb{N}_{\geq 1}$ . For  $X, Y \subseteq V(G)$ . It holds that:

$$w(N_G(X)) + w(N_G(Y)) \geq w(N_G(X \cap Y)) + w(N_G(X \cup Y)).$$

*Proof Overview.* The proof is identical to that of Theorem 15, establishing that for every vertex  $v \in V(G)$ , the number of times it is accounted for in the left-hand-side (LHS) is at least as large as the number of times it is accounted for in the right-hand-side (RHS), thereby proving the claim. Since the weights are positive, the claim follows.  $\square$

Recall from Definition 1 that for two minimal  $s, t$ -separators  $S_1, S_2 \in \mathcal{S}_{s,t}(G)$ , it holds:

$$S_1 \preceq S_2 \text{ if and only if } C_s(G - S_1) \subseteq C_s(G - S_2).$$

**Theorem 16.** (Theorem 8.4 in Cygan et al. [2015]) Let  $G$  be an undirected, unweighted graph. There exists a minimum-cardinality  $s, t$ -separator  $S^* \in \mathcal{L}_{s,t}(G)$ , such that  $S^* \preceq S$  for every  $S \in \mathcal{L}_{s,t}(G)$ .

Lemma 8 presents the weighted version of Theorem 16. The proof is similar to that of Theorem 16, and is provided below for completeness.

**Lemma 8.** Let  $G$  be an undirected, weighted graph, with weight function  $w : V(G) \rightarrow \mathbb{N}_{\geq 1}$ . There exists a minimum-weight  $s, t$ -separator  $S^* \in \mathcal{L}_{s,t}(G)$ , such that  $S^* \preceq S$  for every  $S \in \mathcal{L}_{s,t}(G)$ .

*Proof.* Let  $S_1, S_2 \in \mathcal{L}_{s,t}(G)$ . By Lemma 7 and Lemma 1 we have that:

$$\begin{aligned} w(S_1) + w(S_2) &\stackrel{\text{Lemma 1}}{=} w(N(C_s(G - S_1))) + w(N(C_s(G - S_2))) \\ &\stackrel{\text{Lemma 7}}{\geq} w(N(C_s(G - S_1) \cap C_s(G - S_2))) + w(N(C_s(G - S_1) \cup C_s(G - S_2))). \end{aligned} \quad (11)$$

Define  $S^- \stackrel{\text{def}}{=} N(C_s(G - S_1) \cap C_s(G - S_2))$  and  $S^+ \stackrel{\text{def}}{=} N(C_s(G - S_1) \cup C_s(G - S_2))$ . Since  $s \in C_s(G - S_1) \cap C_s(G - S_2)$ , and  $t \notin C_s(G - S_1) \cup C_s(G - S_2)$ , then both  $S^-$  and  $S^+$  are  $s, t$ -separators of  $G$ . Therefore,  $w(S^-) \geq \kappa_{s,t}(G) = w(S_1) = w(S_2)$ , and  $w(S^+) \geq \kappa_{s,t}(G) = w(S_1) = w(S_2)$ .

From (11), we have that

$$2\kappa_{s,t}(G) = w(S_1) + w(S_2) \geq w(S^-) + w(S^+) \geq 2\kappa_{s,t}(G),$$

and hence,  $w(S^-) = w(S^+) = \kappa_{s,t}(G)$ . Since  $S^- = N(C_s(G - S_1) \cap C_s(G - S_2))$ , then by definition,  $S^- \preceq S_1$  and  $S^- \preceq S_2$ . Since  $\mathcal{L}_{s,t}(G)$ , the set of minimum-weight  $s, t$ -separators of  $G$ , is finite, this proves the claim.  $\square$

We are now ready to prove Theorem 4

**THEOREM 4** There exists a unique minimum  $s, t$ -separator  $S^* \in \mathcal{L}_{s,t}(G)$  such that  $S^* \preceq S$  for all  $S \in \mathcal{L}_{s,t}(G)$ , and  $S^*$  can be found in time  $O(n \cdot \ell \cdot T(n, m))$ , where  $\ell$  is the maximum-cardinality of any minimum-weight  $s, t$ -separator;  $\ell \stackrel{\text{def}}{=} \max \{|S| : S \in \mathcal{L}_{s,t}(G)\}$ .

*Proof.* From Lemma 8 we have that  $S^* \in \mathcal{L}_{s,t}(G)$  exists and is unique. We show that it can be found in time  $O(n \cdot T(n, m))$ . Finding a minimum-weight  $s, t$ -separator can be reduced, by standard techniques to the maximum-flow problem. Let  $S_1 \in \mathcal{L}_{s,t}(G)$  be a minimum-weight  $s, t$ -separator found in this way. Now, we need to check whether there is another  $S_2 \in \mathcal{L}_{s,t}(G)$  such that  $S_2 \prec S_1$ . If  $C_s(G-S_2) \subset C_s(G-S_1)$ , then by Proposition 1 it holds that  $C_t(G-S_1) \subset C_t(G-S_2)$ . In particular,  $S_1 = N(C_t(G-S_1)) \subseteq C_t(G-S_2) \cup N(C_t(G-S_2)) = C_t(G-S_2) \cup S_2$ . Since  $S_1, S_2 \in \mathcal{L}_{s,t}(G)$ , then  $S_1 \not\subseteq S_2$ , and hence  $S_1 \cap C_t(G-S_2) \neq \emptyset$ . In other words, if  $S_2 \prec S_1$ , then there must be a vertex  $v \in S_1$  that belongs to  $C_t(G-S_2)$ . We check if this is the case by iterating over all vertices  $v \in S_1$ , and contracting  $C_t(G-S_1) \cup \{v\}$  to the vertex  $t$ , and finding a minimum-weight  $s, t$ -separator in the resulting graph. If, for all  $v \in S_1$ , this results in a separator whose weight is strictly larger than  $\kappa_{s,t}(G)$ , then we have identified the minimum-weight  $s, t$ -separator that is closest to  $s$ . Otherwise, we repeat this procedure until no such vertex  $v \in S_1$  is found – indicating that the computed  $s, t$ -separator is both minimum-weight, and closest to  $s$ .  $\square$

## B PROOFS FROM SECTION 5: CORRECTNESS OF ALGORITHM SmallMinimalSepS

**Lemma 9.** Let  $v \in N_G(s)$ , and let  $G'$  denote the graph that results from  $G$  by contracting the edge  $(s, v)$  to  $s$ . Then  $\mathcal{S}_{s,t}(G') = \{S \in \mathcal{S}_{s,t}(G) : v \notin S\}$ .

*Proof.* Let  $G''$  be the graph that results from  $G$  by adding all edges between  $s$  and  $N_G(v)$ . By definition, this means that  $N_{G''}(v) \subseteq N_{G''}(s)$ . We first show that  $\mathcal{S}_{s,t}(G'') = \{S \in \mathcal{S}_{s,t}(G) : v \notin S\}$ .

Let  $S \in \mathcal{S}_{s,t}(G)$  such that  $v \notin S$ . Since  $v \in N_G(s)$ , then  $v \in C_s(G-S)$ , and hence  $N_G(v) \subseteq S \cup C_s(G-S)$ . Therefore,  $S$  is an  $s, t$ -separator in  $G''$  as well. Since  $\mathbb{E}(G'') \supseteq \mathbb{E}(G)$ , then by Lemma 4  $S \in \mathcal{S}_{s,t}(G'')$ .

Now, let  $T \in \mathcal{S}_{s,t}(G'')$ . Since  $\mathbb{E}(G) \subseteq \mathbb{E}(G'')$  then clearly  $T$  is an  $s, t$ -separator of  $G$ . Since  $N_{G''}(v) \subseteq N_{G''}(s)$ , then by Lemma 5 it holds that  $\mathcal{S}_{s,t}(G'') = \mathcal{S}_{s,t}(G''-v)$ . Therefore, we have that  $v \notin T$ . If  $T \notin \mathcal{S}_{s,t}(G)$ , then there exists a  $T' \subset T$  such that  $T' \in \mathcal{S}_{s,t}(G)$ . Since  $v \notin T$ , then  $v \notin T'$ . We have previously established that  $\mathcal{S}_{s,t}(G'') \supseteq \{S \in \mathcal{S}_{s,t}(G) : v \notin S\}$ , and hence  $T' \in \mathcal{S}_{s,t}(G'')$ . But this contradicts the minimality of  $T$ . Therefore,  $T \in \{S \in \mathcal{S}_{s,t}(G) : v \notin S\}$ , and we have that  $\mathcal{S}_{s,t}(G'') = \{S \in \mathcal{S}_{s,t}(G) : v \notin S\}$ .

By construction, we have that  $N_{G''}(v) \subseteq N_{G''}(s)$ . By Lemma 5 we have that  $\mathcal{S}_{s,t}(G'') = \mathcal{S}_{s,t}(G''-v) = \mathcal{S}_{s,t}(G')$ . Therefore, we get that  $\mathcal{S}_{s,t}(G') = \{S \in \mathcal{S}_{s,t}(G) : v \notin S\}$ .  $\square$

**Lemma 10.** Let  $S, T \in \mathcal{S}_{s,t}(G)$ . Then:

$$C_s(G-S) \subseteq C_s(G-T) \text{ if and only if } T \subseteq S \cup C_t(G-S).$$

*Proof.* If  $T \subseteq S \cup C_t(G-S)$ , then by definition  $T \cap C_s(G-S) = \emptyset$ . Therefore,  $C_s(G-S)$  remains connected in  $G-T$ . This means that  $C_s(G-S) \subseteq C_s(G-T)$ .

Now, suppose that  $C_s(G-S) \subseteq C_s(G-T)$ . By Lemma 1 it holds that  $S = N_G(C_s(G-S))$ . Since  $C_s(G-S) \subseteq C_s(G-T)$ , then  $S = N_G(C_s(G-S)) \subseteq T \cup C_s(G-T)$ . Since  $S \subseteq T \cup C_s(G-T)$  then by definition it holds that  $S \cap C_t(G-T) = \emptyset$ . This, in turn, implies that  $C_t(G-T)$  remains connected in  $G-S$ . In particular, we have that  $C_t(G-T) \subseteq C_t(G-S)$ . By Lemma 1 it holds that  $T = N_G(C_t(G-T))$ . Since  $C_t(G-T) \subseteq C_t(G-S)$ , then  $T = N_G(C_t(G-T)) \subseteq S \cup C_t(G-S)$ .  $\square$

**Lemma 11.** Let  $S \in \mathcal{S}_{s,t}(G)$ , and let  $H_S$  be the graph that results from  $G$  by adding all edges from  $s$  to  $S$ . That is,  $\mathbb{E}(H_S) = \mathbb{E}(G) \cup \{(s, v) : v \in S\}$ . Then:

$$\mathcal{S}_{s,t}(H_S) = \{Q \in \mathcal{S}_{s,t}(G) : Q \subseteq S \cup C_t(G-S)\}$$

*Proof.* Let  $Q \in \mathcal{S}_{s,t}(G)$  where  $Q \subseteq S \cup C_t(G-S)$ . Since  $Q \cap C_s(G-S) = \emptyset$ , then  $C_s(G-S)$  remains connected in  $G-Q$ . Therefore,  $C_s(G-S) \subseteq C_s(G-Q)$ . By Lemma 1  $S = N_G(C_s(G-S))$ . Since  $C_s(G-S) \subseteq C_s(G-Q)$ , then  $S = N_G(C_s(G-S)) \subseteq C_s(G-Q) \cup Q$ . In particular,  $S \cap C_t(G-Q) = \emptyset$ . Consequently,  $Q$  separates  $C_t(G-Q)$  from  $s$  in  $H_S$  as well. That is,  $Q$  is an  $s, t$ -separator in  $H_S$ . Since  $\mathbb{E}(H_S) \supseteq \mathbb{E}(G)$ , then  $Q \in \mathcal{S}_{s,t}(H_S)$ .

Let  $T \in \mathcal{S}_{s,t}(H_S)$ . By construction,  $S \in \mathcal{S}_{s,t}(H_S)$  where  $S \subseteq N_H(s)$ . By Proposition 3  $C_s(H_S-S) \subseteq C_s(H_S-T)$ . By Lemma 10 it holds that  $T \subseteq S \cup C_t(H_S-S)$ . Since, by construction,  $C_t(H_S-S) = C_t(G-S)$ , we get that  $T \subseteq S \cup C_t(G-S)$ .  $\square$

**Lemma 12.** Let  $T \in \mathcal{S}_{s,t,k}(G)$ . Exactly one of the following holds: (1)  $T \in \mathcal{S}_{s,t,k}^*(G)$  or (2) There exists a minimal  $s, t$ -separator  $S \in \mathcal{S}_{s,t,k}^*(G)$  such that  $S \prec T$ .

*Proof.* By induction on  $|C_s(G-T)|$ . If  $|C_s(G-T)| = 1$ , then clearly  $T \subseteq N_G(s)$ . By Lemma 2,  $T$  is the unique minimal  $s, t$ -separator that is closest to  $s$ , and hence  $T \in \mathcal{S}_{s,t,k}^*(G)$ . So, we assume that the claim holds for all  $T \in \mathcal{S}_{s,t,k}(G)$ , where  $1 \leq |C_s(G-S)| \leq \ell$ . Let  $T \in \mathcal{S}_{s,t,k}(G)$ , where  $|C_s(G-S)| = \ell + 1$ . If  $T \in \mathcal{S}_{s,t,k}^*(G)$ , then we are done. Otherwise, if  $T \notin \mathcal{S}_{s,t,k}^*(G)$ , then since  $|T| \leq k$ , it must hold that  $T \notin \mathcal{S}_{s,t}^*(G)$ . By definition 2, there exists a  $T' \in \mathcal{S}_{s,t}(G)$  such that  $T' \prec T$  (i.e.,  $C_s(G-T') \subset C_s(G-T)$ ), and  $|T'| \leq |T| \leq k$ . Consequently,  $|C_s(G-T')| < |C_s(G-T)| = \ell + 1$ , and  $|C_s(G-T')| \leq \ell$ . Since  $T' \in \mathcal{S}_{s,t,k}(G)$  and  $|C_s(G-T')| \leq \ell$ , then by the induction hypothesis, either  $T' \in \mathcal{S}_{s,t,k}^*(G)$ , in which case  $T' \prec T$ , thus proving the claim. Otherwise, there exists an  $S \in \mathcal{S}_{s,t,k}^*(G)$  such that  $S \prec T'$ . Hence,  $S \prec T' \prec T$ , and  $S \prec T$ , thus proving the claim.  $\square$

**Lemma 13.** Let  $T \in \mathcal{S}_{s,t,k}(G)$ . There exists a  $S \in \mathcal{S}_{s,t,k}^*(G)$  such that  $S \preceq T$ , and  $T \subseteq S \cup C_t(G-S)$ .

*Proof.* If  $T \in \mathcal{S}_{s,t,k}^*(G)$ , then the claim is immediate. If  $T \notin \mathcal{S}_{s,t,k}^*(G)$  then, by Lemma 12, there exists an  $S \in \mathcal{S}_{s,t,k}^*(G)$ , such that  $S \prec T$ . By Lemma 10,  $T \subseteq S \cup C_t(G-S)$ .  $\square$

**THEOREM 8.** If  $S \subseteq V(G)$  is printed, then  $S \in \mathcal{S}_{s,t,k}(G)$ , and  $S$  is printed exactly once.

*Proof.* Every subset of vertices inserted into the queue (in lines 7 and 18) is pushed exactly once and has cardinality at most  $k$ . Therefore, we only need to show that every subset of vertices pushed into the queue  $Q$ , and printed by the algorithm, belongs to  $\mathcal{S}_{s,t}(G)$ . Suppose, by way of contradiction, that this is not the case, and let  $T \subseteq V(G)$  be the first subset of vertices printed where  $T \notin \mathcal{S}_{s,t}(G)$ . Then  $T$  must be inserted into the queue in line 18. Consider the set  $S$  that was printed before  $T$  is inserted into the queue. By our assumption  $S \in \mathcal{S}_{s,t}(G)$ . Therefore,  $T \in \mathcal{S}_{s,t,k}^*(H_S^v)$ , where  $v \in S$ . By Lemma 11,  $\mathcal{S}_{s,t}(H_S) \subseteq \mathcal{S}_{s,t}(G)$ . Since  $v \in N_{H_S}(s)$ , and  $H_S^v$  is the graph that results from  $H_S$  by contracting the edge  $(s, v)$  to vertex  $v$ , by Lemma 9, it holds that  $\mathcal{S}_{s,t}(H_S^v) \subseteq \mathcal{S}_{s,t}(H_S) \subseteq \mathcal{S}_{s,t}(G)$ . Since  $T \in \mathcal{S}_{s,t,k}^*(H_S^v) \subseteq \mathcal{S}_{s,t}(H_S^v)$ , we get that  $T \in \mathcal{S}_{s,t}(G)$ , which brings us to a contradiction.  $\square$

**THEOREM 9.** Let  $T \in \mathcal{S}_{s,t,k}(G)$ . Then  $T$  is printed by SmallMinimalSeps in Figure 2.

*Proof.* If  $T \in \mathcal{S}_{s,t,k}^*(G)$ , then  $T$  is inserted into the queue in line 7, and will be printed. Therefore, assume that  $T \notin \mathcal{S}_{s,t,k}^*(G)$ . Suppose that  $T$  is not printed. Let  $T' \in \mathcal{S}_{s,t}(G)$  be the largest minimal  $s, t$ -separator, with respect to  $\prec$ , that is printed by the algorithm, such that  $T' \preceq T$ . In other words, there does not exist a  $T'' \in \mathcal{S}_{s,t}(G)$ , that is printed by the algorithm where  $T' \prec T'' \preceq T$ . By Lemma 13, and the fact that  $T \notin \mathcal{S}_{s,t,k}^*(G)$  such a separator  $T'$  exists.

Since  $C_s(G-T') \subset C_s(G-T)$ , then by Lemma 10, it holds that  $T \in T' \cup C_t(G-T')$ . By Lemma 11, it holds that  $T \in \mathcal{S}_{s,t}(H_{T'})$ . Consider what happens when  $T'$  is popped from the queue in line 9 and the graph  $H_{T'}$  is generated in line 12. Since  $T \neq T'$  (we assume that  $T$  is not printed),  $T' \subseteq N_{H_{T'}}(s)$ , and  $T \in \mathcal{S}_{s,t}(H_{T'})$ , then there exists a vertex  $v \in T'$ , such that  $T \in \mathcal{S}_{s,t}(H_{T'}^v)$  (see line 14). If  $T \in \mathcal{S}_{s,t,k}^*(H_{T'}^v)$ , then  $T$  is pushed into the queue in line 18, and will therefore be printed. Otherwise, by Lemma 13, there exists an  $S \in \mathcal{S}_{s,t,k}^*(H_{T'}^v)$ , such that  $C_s(H_{T'}^v - S) \subseteq C_s(H_{T'}^v - T)$ . By construction, we have that  $C_s(H_{T'} - T') \subset C_s(H_{T'}^v - S) \subseteq C_s(H_{T'} - T)$ . Since  $S$  is pushed into the queue in line 18, then it will be printed by the algorithm in line 10. By Theorem 8, we have that  $S \in \mathcal{S}_{s,t,k}(G)$  is printed by the algorithm, where  $T' \prec S \preceq T$ , contradicting our assumption that  $T'$  is maximal with respect to the partial order  $\prec$ .  $\square$

**THEOREM 10.** Let  $S_1, S_2 \in \mathcal{S}_{s,t,k}(G)$ . If  $S_1 \prec S_2$ , then  $S_1$  is printed before  $S_2$  by Algorithm SmallMinimalSeps.

*Proof.* By Theorem 9, both  $S_1$  and  $S_2$  are printed by the algorithm. Consider the point in time where  $S_2$  is pushed into the queue  $Q$ .

1. **Case 1:**  $S_1 \in \mathcal{M}$ . In that case, when  $S_2$  is pushed into the queue,  $S_1$  has already been printed, and hence  $S_1$  is printed before  $S_2$ .
2. **Case 2:**  $S_1 \in Q$ . Since  $Q$  is a priority queue sorted according to  $\prec$ , then  $S_1$  will be popped from the queue  $Q$  (in line 9), and printed (in line 10) before  $S_2$  is popped (and printed).



3. **Case 3:**  $S_1$  is generated and inserted into the queue *after*  $S_2$  is printed. In that case, by the workings of the algorithm,  $S_1 \in \mathcal{S}_{s,t,k}(H_{S_2}^v)$  for some  $v \in S_2$  (see lines [13]-[18]). By Lemma [9]  $S_1 \in \mathcal{S}_{s,t,k}(H_{S_2}^v) \subseteq \mathcal{S}_{s,t,k}(H_{S_2})$ . By Lemma [11] if  $S_1 \in \mathcal{S}_{s,t,k}(H_{S_2})$ , then  $S_1 \in \mathcal{S}_{s,t,k}(G)$  where  $S_1 \subseteq S_2 \cup C_t(G-S_2)$ . By Lemma [10] we have that  $C_s(G-S_2) \subseteq C_s(G-S_1)$ ; a contradiction. Therefore, only cases 1 and 2 are possible, which means that  $S_1$  is printed before  $S_2$ .  $\square$

**THEOREM [11]** *The delay between the printing of minimal  $s, t$ -separators whose size is at most  $k$  is  $O(k^2 4^k (n + m))$ .*

*Proof.* The size of the queue  $Q$  and the data structure  $\mathcal{M}$ , can be at most  $n^k$ . We make the standard assumption that these data structures allow logarithmic insertion and extraction, which take time  $O(k \log n)$ . Applying Theorem [5] which states that there are at most  $4^k$  important separators that can be found in time  $O(k 4^k (n + m))$ , we get that the loop in lines [13]-[18] runs in time:  $O(k \cdot (n + 4^k \cdot k \cdot (n + m)) + k \cdot 4^k \cdot \log n)$ . Overall, the delay is  $O(4^k k^2 (n + m))$ .  $\square$

## C PROOFS FROM SECTION [6]

We prove that  $\mathcal{S}_{s,t}(G, \bar{U}) = \mathcal{S}_{s,t}(\text{Sat}(G, U))$ . We proceed by a series of lemmas.

**Lemma 14.** Let  $u \in V(G)$  such that  $N_G[u]$  forms a clique. Then  $u \notin S$  for every  $S \in \mathcal{S}_{s,t}(G)$ .

*Proof.* Let  $S \in \mathcal{S}_{s,t}(G)$ . By Lemma [1]  $G-S$  contains two full connected components  $C_s(G-S)$  and  $C_t(G-S)$  containing  $s$  and  $t$  respectively, such that  $S = N_G(C_s(G-S)) = N_G(C_t(G-S))$ . Therefore, if  $u \in S$ , then it has two neighbors  $v_1 \in C_s(G-S)$  and  $v_2 \in C_t(G-S)$  that are connected by an edge (because  $N_G[u]$  is a clique). But then, there is an  $s, t$ -path in  $G-S$  that avoids  $S$ , which contradicts the fact that  $S$  is an  $s, t$ -separator.  $\square$

**Lemma 15.** If  $S \in \mathcal{S}_{s,t}(G, \bar{u})$ , there exists a connected component  $C_u \in \mathcal{C}(G-S)$  such that  $N_G[u] \subseteq C_u \cup S$ .

*Proof.* Let  $C_u \in \mathcal{C}(G-S)$  be the connected component that contains  $u$ . Such a component must exist because  $u \notin S$ . If  $N_G(u) \not\subseteq C_u \cup S$ , then there exists a vertex  $v \in N_G(u)$  that resides in a connected component  $C_v \in \mathcal{C}(G-S)$  distinct from  $C_u$ . But this is a contradiction because, by definition,  $(u, v) \in E(G)$ . Hence,  $C_v = C_u$ , and this proves the claim.  $\square$

**Lemma 16.** Let  $u \in V(G)$ . Then  $\mathcal{S}_{s,t}(G, \bar{u}) = \mathcal{S}_{s,t}(\text{Sat}(G, \{u\}))$ .

*Proof.* Let  $S \in \mathcal{S}_{s,t}(G, \bar{u})$ . By Lemma [15] there exists a connected component  $C_u \in \mathcal{C}(G-S)$  that contains  $u$ , where  $N_G[u] \subseteq C_u \cup S$ . Therefore, no added edge in  $E(\text{Sat}(G, \{u\})) \setminus E(G)$  connects vertices in distinct connected components in  $\mathcal{C}(G-S)$ . Hence,  $S$  separates  $s$  and  $t$  also in  $\text{Sat}(G, \{u\})$ . Since the addition of edges cannot eliminate any path between  $s$  and  $t$ , we get that  $S$  is a minimal  $s, t$ -separator also in  $\text{Sat}(G, \{u\})$ .

Now, let  $S \in \mathcal{S}_{s,t}(\text{Sat}(G, \{u\}))$ . Hence,  $N_G[u]$  is a clique in  $\text{Sat}(G, \{u\})$ . By Lemma [14]  $u \notin S$ . Since  $G$  is a subgraph of  $\text{Sat}(G, \{u\})$ , then if  $S$  separates  $s$  from  $t$  in  $\text{Sat}(G, \{u\})$ , it must separate  $s$  from  $t$  in  $G$ . Hence,  $S$  is an  $s, t$ -separator in  $G$  where  $u \notin S$ . It is left to show that  $S$  is a *minimal*  $s, t$ -separator in  $G$ . To that end, we show that the connected components  $C_s \stackrel{\text{def}}{=} C_s(\text{Sat}(G, \{u\})-S)$ ,  $C_t \stackrel{\text{def}}{=} C_t(\text{Sat}(G, \{u\})-S)$ , containing  $s$  and  $t$  respectively, are full connected components of  $S$  also in  $G$ . That is, we show that  $S = N_G(C_s) = N_G(C_t)$ . By Lemma [1] this proves that  $S \in \mathcal{S}_{s,t}(G, \bar{u}) \subseteq \mathcal{S}_{s,t}(G)$ .

Denote by  $D_s, D_t \in \mathcal{C}(G-S)$  the connected components containing  $s$  and  $t$  respectively in  $G-S$ . Since  $G[D_s]$  ( $G[D_t]$ ) is connected,  $D_s \cap S = \emptyset$  ( $D_t \cap S = \emptyset$ ), and  $s \in D_s$  ( $t \in D_t$ ), then  $D_s \subseteq C_s$  ( $D_t \subseteq C_t$ ). We now prove that  $C_s \subseteq D_s$ . We first consider the case where  $u \notin C_s$ . Hence, by definition of connected component of  $G-S$ , we have that  $N_G[u] \cap C_s = \emptyset$ . Since the only added edges are between vertices in  $N_G(u)$ , then  $E(\text{Sat}(G, u)[C_s]) = E(G[C_s])$ . Therefore  $C_s$  is a connected component containing  $s$  also in  $G-S$ , thus  $C_s \subseteq D_s$ , and  $C_s = D_s$ . Since  $N_G[u] \cap C_s = \emptyset$ , then  $N_G(C_s) = N_{\text{Sat}(G, \{u\})}(C_s) = S$  as required.

We now consider the case where  $u \in C_s$ , and suppose, by way of contradiction, that  $C_s \not\subseteq D_s$ . Let  $v \in C_s \setminus D_s$ . This means that there is a path from  $s$  to  $v$  in  $\text{Sat}(G, \{u\})$  that avoids  $S$ . Let  $P$  denote the shortest such path. Then  $P$  passes through a single edge  $(y, w) \in E(\text{Sat}(G, u)) \setminus E(G)$ . In other words, there is a path  $P_{vy}$  from  $v$  to  $y$  in  $G$  that avoids  $S$ , and a path  $P_{sw}$  from  $s$  to  $w$  in  $G$  that avoids  $S$ . In particular,  $V(P_{sw}) \subseteq D_s$ . By construction,  $\{y, w\} \subseteq N_G(u)$ . Since  $V(P_{ws}) \cap S = \emptyset$ ,  $w \in N_G(u)$ , and  $\{u, w, y\} \cap S = \emptyset$ , this means that  $\{u, w, y\} \subseteq D_s$ . But this means that the path  $P_{vy}uP_{ws}$  is contained

in  $G$ , and avoids  $S$ . Consequently,  $v \in D_s$ , and we arrive at a contradiction. Hence,  $D_s = C_s$ . Since  $u \in C_s$ , we get that  $N_G(C_s) = N_{\text{Sat}(G, \{u\})}(C_s)$ , making  $C_s$  a full connected component of  $S$  also in  $G$ .  $\square$

**THEOREM 12**  $\mathcal{S}_{s,t}(G, \bar{U}) = \mathcal{S}_{s,t}(\text{Sat}(G, U))$ .

*Proof.* The fact that  $\mathcal{S}_{s,t}(G, \bar{U}) = \mathcal{S}_{s,t}(\text{Sat}(G, U))$  follows from Lemma 16 by induction on  $|U|$ .

Let  $0 \leq k \leq n$  be an integer, and  $\mathcal{S}_{s,t}(G, \bar{U})^k$  and  $\mathcal{S}_{s,t}(\text{Sat}(G, U))^k$  denote the sets of minimal  $s, t$ -separators in  $\mathcal{S}_{s,t}(G, \bar{U})$  and  $\mathcal{S}_{s,t}(\text{Sat}(G, U))$  whose size is exactly  $k$ , respectively. Since  $\mathcal{S}_{s,t}(G, \bar{U}) = \mathcal{S}_{s,t}(\text{Sat}(G, U))$ , then  $\mathcal{S}_{s,t}(G, \bar{U})^k = \mathcal{S}_{s,t}(\text{Sat}(G, U))^k$  for every integer  $0 \leq k \leq n$ . In particular, this is the case for  $k = \kappa_{s,t}(G, \bar{U}) = \kappa_{s,t}(\text{Sat}(G, U))$ . Hence,  $\mathcal{L}_{s,t}(G, \bar{U}) = \mathcal{L}_{s,t}(\text{Sat}(G, U))$ .  $\square$

**THEOREM 13** Let  $S$  be an  $s, t$ -separator of  $G$ . There exists an  $s, t$ -separator  $S'$  printed by the algorithm where  $S' \subseteq S$ .

*Proof.* Let  $T$  be an  $s, t$ -separator of  $G$ , and suppose, by way of contradiction that neither  $T$ , nor any of its subsets are printed. Every triple  $\langle H, S, I \rangle$  pushed into the queue  $Q$  in lines 3 and 11 corresponds to a pair of inclusion/exclusion constraints that restrict the set of  $s, t$ -separators to those that include vertices  $I$ , and exclude vertices  $U \subseteq V(G)$  that have been saturated in  $G$  (i.e., to form  $H$ ). Let  $\langle H, S, I \rangle$  be the triple, inserted into  $Q$ , where: (1)  $I \subseteq T$ , and (2)  $U \subseteq V(G) \setminus T$ , which maximizes  $|I| + |U|$ . Note that such a triple  $\langle H, S, I \rangle$  must exist because the first triple pushed into the queue  $Q$  in line 3 is  $\langle G, S, \emptyset \rangle$  where  $S \in \mathcal{L}_{s,t}(G)$ ,  $I = \emptyset \subseteq T$ , and no vertex of  $G$  has yet been saturated and hence  $U = \emptyset \subseteq V(G) \setminus T$ .

Let  $S \setminus I = \{v_1, \dots, v_q\}$ . By our assumption,  $S \not\subseteq T$ . Let  $\ell \leq q$  be the smallest index such that  $v_\ell \notin T$ . In other words,  $\{v_1, \dots, v_{\ell-1}\} \subseteq T$ , and  $v_\ell \notin T$ . In the  $\ell$ th iteration of the loop in lines 7-11 the algorithm generates a triple  $\langle H_\ell, S_\ell, I_\ell \rangle$ , where  $I_\ell \stackrel{\text{def}}{=} I \cup \{v_1, \dots, v_{\ell-1}\} \subseteq T$ , and  $H_\ell$  is the graph that metrizes the condition of excluding  $U - \ell \stackrel{\text{def}}{=} U \cup \{v_\ell\}$ . In other words, the algorithm generates a triple with inclusion constraints  $I \subseteq I_\ell \subseteq T$ , and exclusion constraint  $U_\ell \stackrel{\text{def}}{=} U \cup \{v_\ell\} \subset U$ , where  $U_\ell \subseteq V(G) \setminus T$ , and  $|U_\ell| > |U|$ . But then,  $\langle H, S, I \rangle$  does not maximize  $|I| + |U|$ ; a contradiction.  $\square$

## D MINIMAL SEPARATORS AND CHORDLESS $s, t$ -PATHS

In this section we show that given a set  $I \subseteq V(G)$ , it is NP-hard to decide whether there exists a minimal  $s, t$ -separator  $S \in \mathcal{S}_{s,t}(G)$  such that  $I \subset S$ . We prove this by showing a reduction from the problem 3-IN-A-PATH that asks whether there is an induced (or chordless) path containing three given terminals. Bienstock [Bienstock, 1991] has shown that deciding whether two terminals belong to an induced cycle is NP-hard. From this, it is easy to show that the 3-IN-A-PATH problem is NP-hard even for graphs whose degree is at most three [Derhy and Picouleau, 2009]. In fact, even deciding whether there is such a path of length at most  $k$  was shown to be  $W[1]$ -complete with respect to the length parameter  $k$  [Haas and Hoffmann, 2006]. The related problem, called THREE-IN-A-TREE, for deciding whether there is an induced tree containing three terminals, is in PTIME [Lai et al., 2020].

**Theorem 17.** Let  $v \in V(G)$ . There exists a minimal  $s, t$ -separator that includes  $v$  if and only if there exists a chordless  $s, t$ -path through  $v$ .

*Proof.* Let  $S \in \mathcal{S}_{s,t}(G)$  where  $v \in S$ , and let  $C_s(G-S)$ ,  $C_t(G-S)$  denote the connected components of  $G-S$  that contain  $s$  and  $t$  respectively. By Lemma 1, there exists a path from  $s$  to  $v$  where all the internal vertices belong to  $C_s(G-S)$ . Let  $P_{sv}$  denote the shortest such path. Likewise, let  $P_{vt}$  denote the shortest path from  $v$  to  $t$  where all internal vertices belong to  $C_t(G-S)$ . Clearly,  $P_{sv}$  and  $P_{vt}$  are both chordless paths. Since  $C_s(G-S) \cap C_t(G-S) = \emptyset$ , then  $V(P_{sv}) \cap V(P_{vt}) = \{v\}$ . Since  $S \in \mathcal{S}_{s,t}(G)$ , then there are no edges between vertices in  $C_s(G-S)$  and vertices in  $C_t(G-S)$ . Consequently, there are no edges between vertices in  $V(P_{sv})$  and  $V(P_{vt})$ . Therefore, the path  $P_{sv}P_{vt}$  is a chordless  $s, t$ -path that passes through  $v$ . In other words, if  $v \in S$ , then there is an induced  $s, t$ -path through  $v$ .

Let  $P = s, a_1, \dots, a_k, v, b_1, \dots, b_\ell, t$  denote a simple, chordless  $s, t$ -path through  $v$ . If  $v \in N_G(s)$  ( $v \in N_G(t)$ ), then  $k = 0$  ( $\ell = 0$ ). Contract all edges on the sub-path  $P_a \stackrel{\text{def}}{=} (s, a_1, \dots, a_k)$  such that  $P_a$  is reduced to an edge  $(s, v)$ . Likewise, contract all edges on the sub-path  $P_b \stackrel{\text{def}}{=} (b_1, \dots, b_\ell, t)$  such that  $P_b$  is reduced to an edge  $(v, t)$ . Denote the resulting graph by  $G'$ . Since  $P$  is chordless, then there are no edges between  $(a_i, b_j)$  for all  $i \in [1, k]$  and all  $j \in [1, \ell]$ . Therefore, following the contraction,  $s$  and  $t$  are not adjacent in the new graph  $G'$ , and hence separable.

Let  $S' \in \mathcal{S}_{s,t}(G')$  be a minimal  $s, t$ -separator in  $G'$ . By construction,  $v \in N_{G'}(s) \cap N_{G'}(t)$ , and hence  $v \in S'$ . It is left to show that  $S' \in \mathcal{S}_{s,t}(G)$ . Let  $C_s(G'-S')$  and  $C_t(G'-S')$  denote the full connected components of  $G'-S'$  containing  $s$  and  $t$  respectively. Define  $D_s(G-S') \stackrel{\text{def}}{=} C_s(G'-S') \cup \{a_1, \dots, a_k\}$  and  $D_t(G-S') \stackrel{\text{def}}{=} C_t(G'-S') \cup \{b_1, \dots, b_\ell\}$ . By construction,  $D_s(G-S')$  and  $D_t(G-S')$  are disjoint, non-adjacent, and  $G[D_s(G-S')]$  ( $G[D_t(G-S')]$ ) are both connected components in  $G$ . Since  $C_s(G'-S')$  and  $C_t(G'-S')$  are full components of  $S'$  in  $G'$ , and  $D_s(G-S') \supseteq C_s(G'-S')$  and  $D_t(G-S') \supseteq C_t(G'-S')$ , then  $D_s(G-S')$  and  $D_t(G-S')$  are full components of  $S'$  in  $G$ . By Lemma 1,  $S' \in \mathcal{S}_{s,t}(G)$ .  $\square$

Theorem 17 provides a characterization of when a vertex  $v$  is included in a minimal  $s, t$ -separator. By reduction from the 3-IN-A-PATH problem we conclude that deciding whether there is a minimal  $s, t$ -separator containing a subset  $I \subseteq V(G)$  is an NP-complete problem.
